# Supplementary material for: A highly conserved protein of unknown function in Sinorhizobium meliloti affects sRNA regulation similar to Hfq
Source: PubMed Central journal article supplement — Nucleic Acids Res. 2011 Feb 15;39(11):4691–708. doi: 10.1093/nar/gkr060 (PMC3113577; doi:10.1093/nar/gkr060), 2011-02-15
Supplement: supp_gkr060_TableS1_Revised.pdf [file supp_gkr060_TableS1_Revised.pdf]

Supplementary Table 1: Prediction of sRNA binding motifs in genes differentially regulated in *S. meliloti* *hfq*- and *smc0113*- mutants  
**DOWN-REGULATED GENES**

| Target gene     | smRNA | smRNA_motif_seq | Position of motif in smRNA | Position of motif in gene (3') | Length of motif | Gibbs Energy [ $\Delta G$ ; kcal/mol] | Enthalpy [ $\Delta H$ ; kcal/mol] | Entropy [ $\Delta S$ ; cal/(K·mol)] |
|-----------------|-------|-----------------|----------------------------|--------------------------------|-----------------|---------------------------------------|-----------------------------------|-------------------------------------|
| <b>SMc02597</b> | sra21 | CGCCCTTGCCGCC   | 162                        | 368                            | 13              | -17.06                                | -106.6                            | -288.7                              |
| <b>SodC</b>     | sra06 | TGCCGAAGCGGC    | 210                        | 459                            | 12              | -14.57                                | -96.6                             | -264.47                             |
|                 | sra42 | TGCCGCACAGGC    | 116                        | 483                            | 12              | -14.5                                 | -95.3                             | -260.53                             |
|                 | sra43 | CGCCTGCCGTCA    | 774                        | 377                            | 12              | -14.27                                | -95.8                             | -262.88                             |
|                 | sra63 | ATGCGGGCCATT    | 1883                       | 198                            | 12              | -12.21                                | -88.9                             | -247.25                             |
|                 | sra65 | GCCGCGAAGGGC    | 450                        | 93                             | 12              | -15.27                                | -98.3                             | -267.7                              |
|                 | sra13 | CCGGCCGCGAA     | 28                         | 90                             | 11              | -14.08                                | -89.1                             | -241.8                              |
|                 | sra33 | AAGCGAGGAAG     | 201                        | 212                            | 11              | -9.39                                 | -81.6                             | -232.8                              |
|                 | sra47 | GGAGGGCTGGC     | 760                        | 42                             | 11              | -12.66                                | -83.7                             | -229.06                             |
|                 | sra48 | GAGCGTGAAAA     | 38                         | 308                            | 11              | -8.57                                 | -82.8                             | -239.35                             |
|                 | sra49 | TGCTCGGCATT     | 154                        | 226                            | 11              | -10.45                                | -81.7                             | -229.73                             |
|                 | sra50 | GCGGGCCATTG     | 141                        | 200                            | 11              | -12.07                                | -86.1                             | -238.7                              |
|                 | sra53 | CGTCGAGGGAC     | 187                        | 116                            | 11              | -11.26                                | -86.2                             | -241.62                             |
|                 | sra61 | GCCGGCATCGC     | 436                        | 30                             | 11              | -13.66                                | -90.3                             | -247.11                             |
|                 | sra02 | TTGCCGCTG       | 113                        | 373                            | 10              | -10.83                                | -76.5                             | -211.72                             |
|                 | sra10 | AAGCTGTTGA      | 14                         | 130                            | 10              | -7.17                                 | -70.2                             | -203.22                             |
|                 | sra17 | GCCCGGCCGC      | 598                        | 88                             | 10              | -14.5                                 | -82.4                             | -218.91                             |
|                 | sra19 | GAAGGGCGGT      | 155                        | 98                             | 10              | -10.35                                | -74.3                             | -206.18                             |
|                 | sra23 | TTCGCCGCA       | 204                        | 243                            | 10              | -11.5                                 | -76.8                             | -210.56                             |
|                 | sra25 | CGAAGGGCGG      | 228                        | 97                             | 10              | -11.29                                | -78.7                             | -217.36                             |
|                 | sra27 | TCGGCAGGCC      | 16                         | 335                            | 10              | -11.81                                | -76.3                             | -207.92                             |
|                 | sra28 | GATGTCGCC       | 1                          | 185                            | 10              | -10.32                                | -78.8                             | -220.78                             |
|                 | sra34 | CCTTGCCGCC      | 163                        | 371                            | 10              | -11.51                                | -78.2                             | -215.01                             |
|                 | sra39 | TCCTTCGGCA      | 187                        | 331                            | 10              | -9.57                                 | -72.4                             | -202.59                             |
|                 | sra41 | GGCAAATGC       | 111                        | 249                            | 10              | -7.96                                 | -75.3                             | -217.12                             |
|                 | sra45 | GCCGTCGCCG      | 197                        | 433                            | 10              | -13.18                                | -83.8                             | -227.69                             |
|                 | sra55 | CGGCACCGAC      | 282                        | 164                            | 10              | -11.47                                | -80.3                             | -221.92                             |
|                 | sra67 | CGCAAGTTC       | 50                         | 151                            | 10              | -8.84                                 | -76.9                             | -219.46                             |
| <b>SMa2379</b>  | sra06 | GAGCCGCGGAAGGTC | 330                        | 766                            | 15              | -17.25                                | -121.1                            | -334.83                             |
| <b>KatB</b>     | sra17 | CGGGCCTTCCGGG   | 97                         | 1515                           | 13              | -16.22                                | -102.7                            | -278.85                             |
|                 | sra29 | AGGCCGGAATGCC   | 126                        | 2059                           | 13              | -14.39                                | -99.4                             | -274.1                              |
|                 | sra10 | GGTGCGGTCAGC    | 650                        | 355                            | 12              | -13.62                                | -95.8                             | -264.98                             |
|                 | sra30 | GCCGGCGCCGCC    | 182                        | 1851                           | 12              | -18.43                                | -102.8                            | -272.03                             |
|                 | sra45 | CTCGTAAGCGGG    | 28                         | 1050                           | 12              | -11.81                                | -94.1                             | -265.31                             |
|                 | sra46 | GCGCCGCTTCC     | 93                         | 1345                           | 12              | -15.27                                | -98.3                             | -267.7                              |
|                 | sra47 | CCGCCGGCCTTG    | 743                        | 547                            | 12              | -15.06                                | -96.8                             | -263.55                             |
|                 | sra63 | CAAGCACAGAGA    | 2021                       | 662                            | 12              | -9.75                                 | -89                               | -255.52                             |
|                 | sra64 | GTAGCGCTCGTC    | 679                        | 1590                           | 12              | -12.05                                | -96.6                             | -272.6                              |
|                 | sra03 | GCCGCCACGGC     | 307                        | 1857                           | 11              | -15.05                                | -91.3                             | -245.84                             |
|                 | sra22 | TCCATGCGGCC     | 572                        | 508                            | 11              | -12.37                                | -84.2                             | -231.6                              |
|                 | sra27 | CCGAAGTCGGC     | 10                         | 1933                           | 11              | -11.71                                | -87.3                             | -243.74                             |
|                 | sra28 | GCCGCAACGAA     | 116                        | 43                             | 11              | -11.61                                | -87.3                             | -244.06                             |
|                 | sra34 | GCAAAGGTTTC     | 254                        | 1462                           | 11              | -8.02                                 | -82.1                             | -238.84                             |
|                 | sra36 | TCGTGGCCGCC     | 29                         | 541                            | 11              | -13.86                                | -87.5                             | -237.43                             |
|                 | sra53 | AGCGCTTCGGG     | 130                        | 268                            | 11              | -12.44                                | -86.1                             | -237.5                              |
|                 | sra58 | CCGCCTTCAGC     | 94                         | 311                            | 11              | -11.79                                | -86.2                             | -239.92                             |
|                 | sra01 | TGTCGTGGCC      | 324                        | 539                            | 10              | -10.54                                | -76                               | -211.07                             |
|                 | sra05 | CAACCGGGTC      | 134                        | 1493                           | 10              | -9.76                                 | -75.8                             | -212.94                             |

|       |            |     |      |    |        |       |         |
|-------|------------|-----|------|----|--------|-------|---------|
| sra07 | TCCGCGAACT | 103 | 1006 | 10 | -9.8   | -74.9 | -209.91 |
| sra11 | AACCGGGTCG | 50  | 1494 | 10 | -10.4  | -75.7 | -210.53 |
| sra13 | GCCGCGCTTG | 136 | 753  | 10 | -12.12 | -82.6 | -227.25 |
| sra14 | GGCGCCGCCA | 678 | 1854 | 10 | -13.79 | -80.7 | -215.72 |
| sra16 | GGCCGCCGGC | 639 | 545  | 10 | -14.5  | -82.4 | -218.91 |
| sra18 | GACCAGATCA | 205 | 3    | 10 | -7.28  | -70.6 | -204.17 |
| sra19 | GGTCGGGGTC | 162 | 1242 | 10 | -10.73 | -75.6 | -209.15 |
| sra25 | GCCGCCTTCC | 166 | 1347 | 10 | -11.38 | -77.9 | -214.48 |
| sra26 | GCGTTGAAGT | 283 | 637  | 10 | -8.17  | -75.1 | -215.8  |
| sra32 | CCGCAGGCCG | 443 | 324  | 10 | -12.9  | -80.9 | -219.24 |
| sra33 | TCGCGCGCGG | 30  | 1480 | 10 | -14.19 | -85.6 | -230.25 |
| sra38 | GCCCAGGAAA | 350 | 1735 | 10 | -9.02  | -71.7 | -202.1  |
| sra39 | CGGCGGCGCC | 648 | 572  | 10 | -14.78 | -85   | -226.4  |
| sra40 | GCGGTGCGCA | 548 | 15   | 10 | -12.22 | -79.5 | -216.94 |
| sra42 | GTCGAGACAA | 57  | 799  | 10 | -7.61  | -73.8 | -213.42 |
| sra48 | GTGGTTGAAC | 28  | 1203 | 10 | -7.34  | -74   | -214.94 |
| sra49 | CCTTCCGGGT | 261 | 1351 | 10 | -10.01 | -72.5 | -201.47 |
| sra50 | CTTGGCAGCC | 471 | 555  | 10 | -10.04 | -75.9 | -212.36 |
| sra51 | GCCCATATCG | 606 | 231  | 10 | -8.33  | -74.5 | -213.36 |
| sra52 | CTCGACGGCG | 43  | 567  | 10 | -11.44 | -82   | -227.49 |
| sra55 | TTGTCGGAGC | 177 | 760  | 10 | -9.15  | -75   | -212.32 |
| sra56 | GTCCGGCCAG | 55  | 1809 | 10 | -11.07 | -77.1 | -212.9  |
| sra57 | ACGCGCCGGC | 65  | 1169 | 10 | -14.05 | -83.2 | -222.94 |
| sra59 | CCGCAAAGGC | 124 | 98   | 10 | -10.39 | -78.1 | -218.3  |
| sra60 | TGGCCGGCGC | 516 | 1849 | 10 | -13.79 | -80.7 | -215.72 |
| sra61 | CTCGTGGTTG | 165 | 1200 | 10 | -8.53  | -76.1 | -217.86 |
| sra62 | GGTGCTCTTC | 59  | 1311 | 10 | -8.36  | -74.4 | -212.94 |
| sra65 | TGCGACGGGA | 393 | 2142 | 10 | -11.05 | -75.7 | -208.43 |
| sra66 | GCCCAGGAAA | 836 | 1735 | 10 | -9.02  | -71.7 | -202.1  |

|                          |            |              |      |     |        |        |         |         |
|--------------------------|------------|--------------|------|-----|--------|--------|---------|---------|
| <b>SMc01700<br/>ppiA</b> | sra11      | GGATATTTTCGC | 1417 | 485 | 12     | -8.14  | -89.9   | -263.61 |
|                          | sra32      | TGAAGCCCTTGA | 102  | 344 | 12     | -10.29 | -86     | -244.11 |
|                          | sra38      | GGGCGCGAGCAT | 1322 | 147 | 12     | -14.46 | -95.9   | -262.59 |
|                          | sra50      | CCTGGAAACCG  | 536  | 293 | 11     | -10.14 | -83.1   | -235.25 |
|                          | sra63      | GCGGGCCATTC  | 1885 | 198 | 11     | -11.93 | -85.8   | -238.17 |
|                          | sra05      | TGGACGAGCC   | 118  | 263 | 10     | -10.26 | -75.1   | -209.07 |
|                          | sra09      | CTTAACGCTG   | 178  | 12  | 10     | -7.32  | -75.7   | -220.48 |
|                          | sra10      | TTTTCGCCGG   | 38   | 490 | 10     | -9.6   | -76.5   | -215.71 |
|                          | sra17      | AGCGAATTGG   | 573  | 552 | 10     | -8.04  | -73.5   | -211.07 |
|                          | sra19      | CTCCGGCAAC   | 139  | 542 | 10     | -9.95  | -77     | -216.18 |
|                          | sra22      | CATGCCTTCG   | 230  | 93  | 10     | -8.72  | -76.3   | -217.88 |
|                          | sra23      | ATTCCGACGG   | 13   | 205 | 10     | -9.05  | -74.7   | -211.68 |
|                          | sra34      | GACCTTGCCG   | 161  | 105 | 10     | -9.95  | -77     | -216.18 |
|                          | sra35      | CCGACCTTAA   | 79   | 7   | 10     | -7.43  | -71.6   | -206.91 |
|                          | sra39      | CGGCGAGCGC   | 107  | 527 | 10     | -13.39 | -85     | -230.9  |
|                          | sra40      | TCCGGGCGCA   | 577  | 436 | 10     | -12.61 | -76.9   | -207.28 |
|                          | sra43      | TCGCCTGCCG   | 773  | 385 | 10     | -12.07 | -78.9   | -215.48 |
|                          | sra45      | CGATATCCGG   | 373  | 431 | 10     | -8.09  | -75     | -215.72 |
|                          | sra47      | TTCGCCTGCC   | 132  | 384 | 10     | -10.7  | -76.2   | -211.19 |
|                          | sra53      | CAAGGCTCCG   | 379  | 537 | 10     | -9.81  | -76.4   | -214.71 |
|                          | sra57      | GTTGAGGAAG   | 243  | 132 | 10     | -6.92  | -72.5   | -211.44 |
| sra60                    | GCCGCGGCCA | 479          | 391  | 10  | -13.79 | -80.7  | -215.72 |         |
| sra62                    | CGCGCTCGAA | 96           | 218  | 10  | -11.06 | -81.1  | -225.84 |         |
| sra64                    | ACGACGGGGC | 620          | 454  | 10  | -11.86 | -77.6  | -211.95 |         |
| sra65                    | GCGCCAAGGC | 426          | 533  | 10  | -11.86 | -80    | -219.69 |         |

|                                |            |              |      |      |        |        |         |         |
|--------------------------------|------------|--------------|------|------|--------|--------|---------|---------|
| <b>SMc01946</b><br><b>livK</b> | sra08      | ACGCGGTGCCGC | 196  | 1055 | 12     | -16.25 | -100.1  | -270.37 |
|                                | sra11      | TCATCGACTTCT | 1179 | 566  | 12     | -8.74  | -86.4   | -250.39 |
|                                | sra26      | TCCGAAACGTCG | 73   | 892  | 12     | -11.45 | -94.6   | -268.08 |
|                                | sra63      | CGCCGATTGCCG | 1106 | 104  | 12     | -14.07 | -99     | -273.82 |
|                                | sra10      | CAGCGTGCCGT  | 769  | 318  | 11     | -12.75 | -88     | -242.61 |
|                                | sra19      | GCGGCCGGGCT  | 87   | 280  | 11     | -15.28 | -88     | -234.46 |
|                                | sra27      | CGTCCTTGAAA  | 190  | 638  | 11     | -8.24  | -81     | -234.59 |
|                                | sra39      | GCCGGCGGCGC  | 646  | 246  | 11     | -16.79 | -94.8   | -251.53 |
|                                | sra47      | GCGTCCTTGAA  | 272  | 637  | 11     | -9.68  | -82.9   | -236.09 |
|                                | sra49      | TGTGCAGACCG  | 92   | 443  | 11     | -10.95 | -84.3   | -236.49 |
|                                | sra59      | GCAACGGCGCC  | 468  | 670  | 11     | -13.91 | -91.2   | -249.2  |
|                                | sra64      | CTTCTTGTTTT  | 163  | 573  | 11     | -6.92  | -77.9   | -228.85 |
|                                | sra66      | GTCGTCGCCGA  | 549  | 900  | 11     | -12.4  | -88.6   | -245.68 |
|                                | sra02      | CGGCGACCTT   | 29   | 626  | 10     | -10.6  | -76.9   | -213.77 |
|                                | sra03      | TCCTTGAAAT   | 158  | 640  | 10     | -5.65  | -67     | -197.8  |
|                                | sra06      | TGCAGGATGC   | 187  | 766  | 10     | -9.27  | -73.9   | -208.38 |
|                                | sra14      | GGGATCCGAA   | 240  | 888  | 10     | -8.68  | -71.9   | -203.8  |
|                                | sra16      | GCCGGCGGCG   | 643  | 246  | 10     | -14.78 | -85     | -226.4  |
|                                | sra17      | GGATGCCGTT   | 544  | 770  | 10     | -9.28  | -74.2   | -209.32 |
|                                | sra21      | CTTGTCGCCG   | 154  | 513  | 10     | -10.2  | -79.6   | -223.77 |
|                                | sra22      | CCCGCAACGG   | 396  | 667  | 10     | -11.57 | -79.6   | -219.35 |
|                                | sra24      | CACCCTGCTT   | 514  | 878  | 10     | -9.04  | -72.3   | -203.98 |
|                                | sra25      | GAAGGGCCGC   | 218  | 203  | 10     | -11.38 | -77.9   | -214.48 |
|                                | sra30      | GAGCTGCGCG   | 267  | 987  | 10     | -11.87 | -82.7   | -228.36 |
|                                | sra32      | GCCATCGGCC   | 89   | 846  | 10     | -11.41 | -77.9   | -214.38 |
|                                | sra33      | CGGACCAGTC   | 320  | 1011 | 10     | -9.51  | -75.9   | -214.06 |
|                                | sra37      | GCGATATAGG   | 171  | 655  | 10     | -6.69  | -73     | -213.81 |
|                                | sra38      | CCGATGCGGG   | 174  | 794  | 10     | -11.32 | -78.7   | -217.26 |
|                                | sra40      | AGGCGCCCCG   | 516  | 662  | 10     | -13.64 | -80     | -213.96 |
|                                | sra41      | GTCGTGAATG   | 66   | 615  | 10     | -7.32  | -75.7   | -220.48 |
|                                | sra43      | TCATCGTCGC   | 213  | 386  | 10     | -9.28  | -77.3   | -219.31 |
|                                | sra45      | GGTGCGGAAG   | 285  | 702  | 10     | -9.95  | -77     | -216.18 |
|                                | sra48      | GGGCGACGGA   | 105  | 866  | 10     | -11.73 | -77.4   | -211.73 |
|                                | sra51      | TCGGACCACT   | 167  | 1010 | 10     | -9.26  | -71.5   | -200.68 |
|                                | sra53      | CCGCAACGGC   | 411  | 668  | 10     | -11.92 | -81.4   | -224.03 |
| sra57                          | TCTTGCGCGG | 276          | 290  | 10   | -10.94 | -78.8  | -218.78 |         |

|                                |       |               |     |      |    |        |       |         |
|--------------------------------|-------|---------------|-----|------|----|--------|-------|---------|
| <b>SMb21647</b><br><b>agpA</b> | sra10 | TTTCGCCGGGCTT | 39  | 17   | 13 | -14.04 | -99.9 | -276.85 |
|                                | sra27 | GGAAAGCCCCGC  | 470 | 756  | 12 | -13.54 | -93.8 | -258.77 |
|                                | sra43 | TCGTCGGCCTCG  | 142 | 1630 | 12 | -13.9  | -96   | -264.71 |
|                                | sra50 | TGGAATCGCGCG  | 296 | 1931 | 12 | -13.24 | -97   | -270.05 |
|                                | sra56 | TTCACCAGAGCC  | 159 | 793  | 12 | -10.97 | -88.7 | -250.63 |
|                                | sra57 | GAGCCGCGCCGG  | 285 | 966  | 12 | -16.68 | -101  | -271.87 |
|                                | sra60 | CTTTCGCCGGGC  | 334 | 16   | 12 | -13.79 | -96.4 | -266.35 |
|                                | sra02 | CGTTCGTCCGG   | 11  | 889  | 11 | -11.76 | -88.7 | -248.09 |
|                                | sra03 | CGGCAAAGGCA   | 70  | 2021 | 11 | -11.36 | -84.4 | -235.5  |
|                                | sra08 | GCGGGGAAGCC   | 103 | 1243 | 11 | -13.02 | -85.9 | -234.98 |
|                                | sra17 | GCTGGCGATGA   | 132 | 276  | 11 | -11.01 | -84.2 | -235.98 |
|                                | sra22 | CGCCTTCGCGC   | 143 | 879  | 11 | -13.89 | -92.9 | -254.76 |
|                                | sra28 | GCGGCCGCCAA   | 240 | 609  | 11 | -14.31 | -88.6 | -239.54 |
|                                | sra30 | TGACGCGCGGG   | 70  | 947  | 11 | -14.12 | -90.1 | -244.99 |
|                                | sra31 | GCGGCGCGCTT   | 64  | 991  | 11 | -14.76 | -92.3 | -250    |
|                                | sra32 | CCGGCGGCAGC   | 229 | 1847 | 11 | -14.9  | -90.7 | -244.39 |

|       |             |     |      |    |        |       |         |
|-------|-------------|-----|------|----|--------|-------|---------|
| sra38 | GGCGCGGAAG  | 437 | 1361 | 11 | -13.28 | -88.5 | -242.53 |
| sra39 | GCGGCTGCTCG | 421 | 1976 | 11 | -13.52 | -90.7 | -248.85 |
| sra44 | GTATTCGCGCA | 55  | 1902 | 11 | -9.98  | -85.8 | -244.48 |
| sra45 | GCCGCTCGGCC | 236 | 1835 | 11 | -14.77 | -90.4 | -243.86 |
| sra53 | GTCTTTGAGCC | 84  | 660  | 11 | -8.88  | -82.3 | -236.71 |
| sra55 | AGCTCCCGCAC | 66  | 868  | 11 | -12.23 | -84.5 | -233.03 |
| sra61 | TTCCGGCCGGC | 431 | 1737 | 11 | -13.82 | -86.5 | -234.34 |
| sra63 | GGCGGCGCGCT | 901 | 990  | 11 | -15.91 | -92.4 | -246.63 |
| sra64 | CCGCCATGGTG | 471 | 827  | 11 | -11.76 | -85.3 | -237.12 |
| sra01 | CGATGCGTTT  | 55  | 2068 | 10 | -8.4   | -76.7 | -220.22 |
| sra05 | TTGGTGGTGG  | 111 | 217  | 10 | -8.99  | -71.8 | -202.52 |
| sra06 | CTGCTTGCCG  | 205 | 483  | 10 | -10.28 | -78.5 | -219.95 |
| sra11 | CGCCGTCCGA  | 957 | 1529 | 10 | -11.99 | -80   | -219.29 |
| sra14 | TCGCTCGTCA  | 365 | 258  | 10 | -9.7   | -75.7 | -212.81 |
| sra16 | GCCATTGCGA  | 71  | 1342 | 10 | -9.62  | -76.1 | -214.36 |
| sra18 | GCAAGATTAC  | 262 | 553  | 10 | -5.89  | -72.7 | -215.4  |
| sra19 | AGCGCCTTGA  | 252 | 1912 | 10 | -9.89  | -73.8 | -206.07 |
| sra20 | GCGAAAAGAT  | 24  | 1348 | 10 | -6.8   | -73.1 | -213.76 |
| sra24 | GTTCATATAT  | 255 | 1230 | 10 | -3.4   | -66.6 | -203.79 |
| sra26 | TCGGCGCGCC  | 128 | 134  | 10 | -13.92 | -83   | -222.72 |
| sra29 | GGTCGAGAGC  | 105 | 1086 | 10 | -9.57  | -76.8 | -216.76 |
| sra47 | TGCCGGCCTT  | 124 | 1802 | 10 | -11.24 | -73.8 | -201.72 |
| sra48 | GTCGCGCTGC  | 169 | 477  | 10 | -12.02 | -83.3 | -229.82 |
| sra51 | AATTTCTCCG  | 28  | 1873 | 10 | -6.48  | -71.3 | -208.99 |
| sra58 | CTTCAGCGAC  | 98  | 999  | 10 | -8.59  | -77   | -220.57 |
| sra59 | GACTCCACGA  | 16  | 1006 | 10 | -8.71  | -73.9 | -210.18 |
| sra62 | CCTCGATCAG  | 358 | 1550 | 10 | -8.01  | -74.3 | -213.73 |
| sra65 | CCGACGGTAT  | 35  | 202  | 10 | -8.78  | -74.2 | -210.92 |

|                          |            |                |      |      |        |        |         |         |
|--------------------------|------------|----------------|------|------|--------|--------|---------|---------|
| <b>SMc02501<br/>atpD</b> | sra45      | CGACCGGAACCGCG | 83   | 1178 | 14     | -17.29 | -117.1  | -321.81 |
|                          | sra11      | TGATAGAGGTCGT  | 861  | 844  | 13     | -10.11 | -93.9   | -270.16 |
|                          | sra42      | ATCTGGCCCATGT  | 227  | 562  | 13     | -11.97 | -93.5   | -262.88 |
|                          | sra63      | CCGAAGAGGCCGA  | 399  | 970  | 13     | -14.03 | -100.7  | -279.45 |
|                          | sra32      | TGAAGCCCTTGA   | 102  | 113  | 12     | -10.29 | -86     | -244.11 |
|                          | sra38      | TGGATGGCGCGG   | 1204 | 1087 | 12     | -14.26 | -94.8   | -259.68 |
|                          | sra43      | CTTCGCATAGGG   | 29   | 993  | 12     | -10.35 | -90.8   | -259.4  |
|                          | sra10      | CGCCGGACTCG    | 288  | 824  | 11     | -13.09 | -90     | -247.98 |
|                          | sra12      | GCGACAGGAAA    | 118  | 191  | 11     | -9.68  | -82.9   | -236.09 |
|                          | sra17      | TTGCGGGCGCG    | 60   | 211  | 11     | -14.56 | -91.2   | -247.1  |
|                          | sra19      | GAACGAGGCGG    | 489  | 1298 | 11     | -11.71 | -87.3   | -243.74 |
|                          | sra23      | CGGGCGACGGC    | 20   | 220  | 11     | -14.83 | -91.8   | -248.18 |
|                          | sra28      | AGCCGCAACGA    | 115  | 1422 | 11     | -11.9  | -85     | -235.68 |
|                          | sra35      | GCCGGGTCGGT    | 89   | 475  | 11     | -13.51 | -85.6   | -232.45 |
|                          | sra39      | CCGGCTCGCCG    | 622  | 1133 | 11     | -14.68 | -91.2   | -246.73 |
|                          | sra40      | CGTTCCGTCG     | 470  | 1047 | 11     | -11.95 | -89.9   | -251.32 |
|                          | sra47      | GCCTTCGTAC     | 404  | 693  | 11     | -10.37 | -85.6   | -242.55 |
|                          | sra50      | ACGATCATCGG    | 32   | 349  | 11     | -9.36  | -82.7   | -236.47 |
|                          | sra61      | GCCTGCGAAGA    | 232  | 882  | 11     | -10.98 | -84.2   | -236.08 |
|                          | sra02      | CGGCGACCTT     | 29   | 1208 | 10     | -10.6  | -76.9   | -213.77 |
| sra03                    | AGTCGAGCGG | 63             | 380  | 10   | -10.35 | -77    | -214.88 |         |
| sra06                    | CRACTGGTCC | 1              | 1056 | 10   | -9.51  | -75.9  | -214.06 |         |
| sra07                    | TCGCGGGTCC | 74             | 862  | 10   | -11.73 | -77.4  | -211.73 |         |
| sra14                    | CGAAGAACGG | 246            | 179  | 10   | -8.6   | -77.4  | -221.82 |         |
| sra15                    | CCGCGATCGG | 20             | 1187 | 10   | -11.44 | -81    | -224.29 |         |
| sra16                    | TTCGAATGCG | 670            | 1362 | 10   | -8.27  | -76.5  | -219.99 |         |

|       |            |     |      |    |        |       |         |
|-------|------------|-----|------|----|--------|-------|---------|
| sra18 | CAACTTCGAG | 111 | 1289 | 10 | -7.15  | -75.1 | -219.1  |
| sra21 | CGCTCGATCT | 21  | 202  | 10 | -8.99  | -76   | -216.04 |
| sra22 | GCCGCGAACG | 39  | 1221 | 10 | -12.04 | -83.7 | -231.06 |
| sra24 | GAAGCTGCCT | 63  | 1444 | 10 | -9.09  | -73.2 | -206.69 |
| sra25 | GCCGCCGAAG | 223 | 966  | 10 | -11.63 | -80.5 | -222.04 |
| sra26 | TCTTCAGCGG | 91  | 1109 | 10 | -9.01  | -74.4 | -210.84 |
| sra27 | TGCAGGGCCT | 282 | 283  | 10 | -10.88 | -71.6 | -195.77 |
| sra29 | CAACGACTGT | 51  | 1427 | 10 | -7.87  | -74.3 | -214.19 |
| sra30 | TCTTGCCGCC | 175 | 983  | 10 | -10.7  | -76.2 | -211.19 |
| sra36 | GGGTCGACTG | 201 | 305  | 10 | -9.51  | -75.9 | -214.06 |
| sra41 | CCGTAGCCGC | 259 | 1418 | 10 | -11.37 | -80   | -221.29 |
| sra46 | CAGGCCGGTC | 60  | 723  | 10 | -11.07 | -77.1 | -212.9  |
| sra49 | GCGACACTTC | 242 | 323  | 10 | -8.73  | -77.6 | -222.05 |
| sra51 | AGCGGGCCGG | 490 | 1114 | 10 | -13.28 | -78.2 | -209.31 |
| sra53 | CGCCGATGAC | 558 | 1139 | 10 | -10.09 | -79.3 | -223.14 |
| sra54 | GCAACGACTG | 483 | 1426 | 10 | -8.87  | -77.9 | -222.58 |
| sra57 | GCGGAAGATG | 329 | 657  | 10 | -8.59  | -76   | -217.34 |
| sra58 | TCGAGCGCGA | 115 | 422  | 10 | -11.36 | -79.2 | -218.73 |
| sra60 | GCCGGTGCCG | 751 | 469  | 10 | -13.05 | -81.5 | -220.69 |
| sra65 | GAAGACGGAG | 945 | 888  | 10 | -8.12  | -74.9 | -215.3  |
| sra66 | TTGGTCGTGG | 715 | 535  | 10 | -9.09  | -74.1 | -209.61 |

|                 |             |              |              |     |    |        |       |         |
|-----------------|-------------|--------------|--------------|-----|----|--------|-------|---------|
| <b>SMB20428</b> | sra47       | CGCCGAGCCGCT | 200          | 623 | 12 | -15.81 | -98.6 | -266.93 |
|                 | <b>ehuB</b> | sra61        | CGATGATCTTCG | 191 | 68 | 12     | -9.19 | -92.4   |
|                 | sra06       | GCGGGTTGCCT  | 12           | 443 | 11 | -12.47 | -84.4 | -231.92 |
|                 | sra11       | CGGTCGCGCGG  | 30           | 331 | 11 | -15.09 | -94.4 | -255.7  |
|                 | sra16       | GCCGCCATTGC  | 68           | 820 | 11 | -12.41 | -87.9 | -243.4  |
|                 | sra29       | TTGCCTTTCTT  | 6            | 448 | 11 | -7.68  | -77.1 | -223.82 |
|                 | sra36       | TGCAGGCCCGG  | 230          | 568 | 11 | -13.59 | -84.6 | -228.95 |
|                 | sra38       | GGTCGTTGCGC  | 17           | 215 | 11 | -11.85 | -87.9 | -245.2  |
|                 | sra43       | CGCCCGGCCTG  | 63           | 559 | 11 | -14.55 | -88.9 | -239.73 |
|                 | sra60       | TCGGCAACGCC  | 315          | 616 | 11 | -12.73 | -87.4 | -240.75 |
|                 | sra63       | CGACGGGGGCC  | 1343         | 188 | 11 | -14.2  | -87.4 | -236    |
|                 | sra64       | CTCTGGCCATC  | 454          | 304 | 11 | -9.88  | -81.8 | -231.89 |
|                 | sra66       | ATGGAGGCGAC  | 489          | 601 | 11 | -10.67 | -82.3 | -230.95 |
|                 | sra05       | TTCTCCTCGG   | 4            | 364 | 10 | -8.54  | -72.3 | -205.58 |
|                 | sra10       | GACCTTGCCA   | 88           | 672 | 10 | -9.05  | -72.7 | -205.23 |
|                 | sra14       | GCGATGTCTT   | 0            | 415 | 10 | -9.03  | -74.3 | -210.43 |
|                 | sra17       | GCGCCCGGCC   | 596          | 558 | 10 | -14.5  | -82.4 | -218.91 |
|                 | sra19       | GTACCGCCGC   | 15           | 373 | 10 | -11.51 | -80.6 | -222.75 |
|                 | sra20       | ATGTCCTTGT   | 108          | 418 | 10 | -6.88  | -68.3 | -198.03 |
|                 | sra27       | GGCTCGATGA   | 486          | 64  | 10 | -8.9   | -74.1 | -210.21 |
|                 | sra32       | CGTCGATGCG   | 564          | 269 | 10 | -10.34 | -81.9 | -230.73 |
|                 | sra33       | AACGCCGAGC   | 132          | 621 | 10 | -10.94 | -78.7 | -218.47 |
|                 | sra37       | CAGCATCTTC   | 308          | 288 | 10 | -7.14  | -73.7 | -214.6  |
|                 | sra39       | TCGCAGCCTT   | 429          | 38  | 10 | -9.89  | -73.8 | -206.07 |
|                 | sra40       | ATGCGCGCGA   | 260          | 724 | 10 | -11.96 | -80.5 | -220.97 |
|                 | sra46       | GACGGCGGCA   | 241          | 504 | 10 | -12.22 | -79.5 | -216.94 |
|                 | sra50       | ATCCGGCACC   | 725          | 312 | 10 | -10.39 | -74.3 | -206.08 |
|                 | sra51       | TGGCGCCCGG   | 44           | 556 | 10 | -13.44 | -78.9 | -211.07 |
|                 | sra53       | CGCCGCCCGG   | 225          | 377 | 10 | -14.42 | -83.2 | -221.77 |
|                 | sra55       | CGAGCCGCTT   | 332          | 626 | 10 | -10.8  | -78.1 | -217    |
|                 | sra57       | CGCCGCCCGG   | 307          | 377 | 10 | -14.42 | -83.2 | -221.77 |
|                 | sra59       | ACCGGAGACC   | 530          | 666 | 10 | -9.91  | -73.2 | -204.05 |
|                 | sra62       | AGATCTCGCG   | 159          | 638 | 10 | -8.99  | -76   | -216.04 |

|                 |       |              |      |     |    |        |       |         |
|-----------------|-------|--------------|------|-----|----|--------|-------|---------|
|                 | sra65 | GTAGCTCTTG   | 137  | 426 | 10 | -6.85  | -73.2 | -213.93 |
| <b>SMc00421</b> | sra28 | CGGAGCCGATCG | 413  | 809 | 12 | -13.35 | -97   | -269.71 |
| <b>eysK1</b>    | sra43 | CACCAGTTCGGC | 315  | 591 | 12 | -12.15 | -93.9 | -263.59 |
|                 | sra08 | GCACCGTCGAA  | 181  | 23  | 11 | -11.17 | -86.2 | -241.92 |
|                 | sra10 | CCGGCGTTTTTC | 32   | 79  | 11 | -10.82 | -87.1 | -245.93 |
|                 | sra11 | GCGCGGCACCG  | 70   | 122 | 11 | -15.32 | -93.9 | -253.36 |
|                 | sra19 | TGCGGCCGGGC  | 86   | 740 | 11 | -15.44 | -88.7 | -236.22 |
|                 | sra27 | CCGAAGTCGGC  | 10   | 716 | 11 | -11.71 | -87.3 | -243.74 |
|                 | sra30 | GCGGCCGCGAC  | 20   | 679 | 11 | -15.18 | -93.6 | -252.84 |
|                 | sra38 | GGTGCCGATGC  | 170  | 396 | 11 | -11.97 | -86.8 | -241.28 |
|                 | sra39 | TCCTGCCGGCG  | 642  | 74  | 11 | -13.71 | -86.9 | -235.98 |
|                 | sra52 | CTCGACGGCGA  | 43   | 324 | 11 | -12.26 | -88   | -244.21 |
|                 | sra57 | GAGCCGCGCCG  | 285  | 171 | 11 | -15.03 | -93   | -251.38 |
|                 | sra60 | GCCGGTGCCGA  | 751  | 393 | 11 | -13.86 | -87.5 | -237.43 |
|                 | sra63 | CGCCGATGCGG  | 1176 | 791 | 11 | -13.57 | -91.1 | -249.99 |
|                 | sra65 | TCCAGATCTCC  | 500  | 443 | 11 | -8.63  | -77.7 | -222.7  |
|                 | sra01 | GCGGCCGCCG   | 422  | 291 | 10 | -14.78 | -85   | -226.4  |
|                 | sra02 | GCGGCCGCGA   | 240  | 679 | 10 | -13.92 | -83   | -222.72 |
|                 | sra05 | TCTCTCGGC    | 5    | 449 | 10 | -9.98  | -74.2 | -207.06 |
|                 | sra13 | GCCGACCGGC   | 91   | 141 | 10 | -12.92 | -81.2 | -220.17 |
|                 | sra14 | GGGCGCCGCC   | 677  | 290 | 10 | -14.5  | -82.4 | -218.91 |
|                 | sra16 | TATCGCCGCC   | 64   | 108 | 10 | -10.54 | -77   | -214.28 |
|                 | sra17 | CCGGCGGAAA   | 6    | 130 | 10 | -10.71 | -76.6 | -212.44 |
|                 | sra18 | TTCGAGCTTG   | 115  | 831 | 10 | -7.9   | -74.3 | -214.09 |
|                 | sra20 | CCACCTCTAT   | 58   | 101 | 10 | -6.98  | -68.7 | -199.01 |
|                 | sra25 | GCCCTTTTCC   | 237  | 861 | 10 | -8.57  | -73.3 | -208.71 |
|                 | sra32 | GCGTGATCTT   | 209  | 749 | 10 | -7.93  | -74.2 | -213.67 |
|                 | sra33 | CGGCGTTTTTC  | 362  | 80  | 10 | -9.18  | -79.1 | -225.43 |
|                 | sra34 | TGCCGCCGGT   | 166  | 389 | 10 | -12.74 | -77.1 | -207.5  |
|                 | sra40 | CTCGGGCATG   | 10   | 645 | 10 | -9.84  | -76.4 | -214.61 |
|                 | sra41 | AAATGCCGAC   | 115  | 137 | 10 | -8.18  | -74.1 | -212.56 |
|                 | sra45 | CGGTCCTTGA   | 380  | 799 | 10 | -8.82  | -73.2 | -207.59 |
|                 | sra46 | CGCGCCGCCT   | 92   | 175 | 10 | -13.91 | -82.6 | -221.49 |
|                 | sra47 | CACGCCTTCG   | 401  | 150 | 10 | -10.2  | -79.6 | -223.77 |
|                 | sra48 | TCGACGGCGA   | 430  | 325 | 10 | -11.16 | -78   | -215.49 |
|                 | sra49 | GGACCCGGGG   | 50   | 283 | 10 | -11.94 | -75   | -203.33 |
|                 | sra50 | GCCGGGTTCT   | 433  | 487 | 10 | -10.35 | -74.3 | -206.18 |
|                 | sra53 | TCGCCGCTG    | 245  | 110 | 10 | -12.07 | -78.9 | -215.48 |
|                 | sra55 | GCCGGCACCG   | 280  | 372 | 10 | -13.05 | -81.5 | -220.69 |
|                 | sra61 | GCGGAAATGC   | 488  | 133 | 10 | -9.17  | -77.7 | -220.96 |
|                 | sra64 | CTGGAGCGCG   | 634  | 117 | 10 | -11.53 | -80.9 | -223.68 |
|                 | sra66 | GTCGTCGTGC   | 369  | 460 | 10 | -10.24 | -80.9 | -227.82 |

#### UP-REGULATED GENES

| Target gene     | smRNA | smRNA_motif_seq | Position of motif in smRNA | Position of motif in gene (3') | Length of motif | Gibbs Energy [ $\Delta G$ ; kcal/mol] | Enthalpy [ $\Delta H$ ; kcal/mol] | Entropy [ $\Delta S$ ; cal/(K·mol)] |
|-----------------|-------|-----------------|----------------------------|--------------------------------|-----------------|---------------------------------------|-----------------------------------|-------------------------------------|
| <b>SMc00786</b> | sra16 | CAGAAGACGAAAGTT | 8                          | 1510                           | 15              | -11.09                                | -113.1                            | -328.91                             |
| <b>dppA1</b>    | sra07 | CAGCGTGGCAATC   | 202                        | 1548                           | 13              | -12.89                                | -103                              | -290.53                             |
|                 | sra11 | CGGCACGGCGGGC   | 746                        | 434                            | 13              | -18.61                                | -109.9                            | -294.34                             |
|                 | sra28 | GTCGCTGCCAAG    | 149                        | 1564                           | 12              | -12.34                                | -95.1                             | -266.83                             |
|                 | sra34 | GGTTCGGATCGG    | 4                          | 764                            | 12              | -11.78                                | -93.1                             | -262.19                             |
|                 | sra38 | GCCGGCATCCTC    | 1258                       | 507                            | 12              | -13.33                                | -93.9                             | -259.78                             |

|       |              |     |      |    |        |       |         |
|-------|--------------|-----|------|----|--------|-------|---------|
| sra12 | GGTTGAGCTGG  | 171 | 995  | 11 | -10.13 | -82.7 | -234    |
| sra25 | CGAAGGGCCGGC | 228 | 695  | 11 | -13.28 | -88.5 | -242.53 |
| sra37 | CCATGCCCGCG  | 200 | 1169 | 11 | -13.45 | -88.8 | -242.96 |
| sra48 | CCGAGGATGAC  | 213 | 313  | 11 | -9.79  | -82.9 | -235.72 |
| sra53 | CTTCCACTGGC  | 734 | 1230 | 11 | -10.13 | -82.7 | -234    |
| sra58 | TGCCGGCCATC  | 29  | 1538 | 11 | -12.37 | -84.2 | -231.6  |
| sra59 | CCGCACCGTCG  | 252 | 323  | 11 | -13.37 | -90.9 | -249.97 |
| sra60 | CCGGTGCCGAG  | 752 | 976  | 11 | -12.97 | -87.7 | -240.95 |
| sra63 | GGCGACGTTGA  | 29  | 729  | 11 | -11.17 | -86.2 | -241.92 |
| sra66 | TGCACGAAGCC  | 376 | 49   | 11 | -11.26 | -85.1 | -238.09 |
| sra04 | GAGATAGGCG   | 30  | 723  | 10 | -8.05  | -74.6 | -214.57 |
| sra06 | CGCCTGCTTG   | 202 | 645  | 10 | -10.28 | -78.5 | -219.95 |
| sra10 | CGAGGAAGTT   | 427 | 275  | 10 | -7.57  | -72.4 | -209.02 |
| sra14 | TGATCGCGAA   | 318 | 869  | 10 | -8.59  | -74.6 | -212.83 |
| sra19 | TCGGTCTCCG   | 134 | 1387 | 10 | -10.03 | -75.6 | -211.42 |
| sra21 | GCGCTCGATC   | 20  | 1239 | 10 | -10.16 | -80.2 | -225.84 |
| sra22 | GTTGATCGCC   | 32  | 654  | 10 | -8.73  | -76.6 | -218.82 |
| sra23 | CGCGGCAGCG   | 110 | 1440 | 10 | -13.52 | -85.3 | -231.42 |
| sra24 | CGACCTTGTC   | 118 | 686  | 10 | -8.4   | -75.8 | -217.32 |
| sra26 | GCGGGCGTTC   | 111 | 441  | 10 | -11.78 | -81.1 | -223.5  |
| sra27 | CGGCAGGCCC   | 17  | 1161 | 10 | -12.64 | -78.3 | -211.71 |
| sra30 | TTTTCCGCCC   | 225 | 900  | 10 | -9.36  | -73.9 | -208.08 |
| sra39 | TTCGGCGAGC   | 105 | 1371 | 10 | -10.81 | -78.5 | -218.25 |
| sra40 | GCGAAAGGAC   | 782 | 967  | 10 | -8.7   | -76.6 | -218.92 |
| sra41 | TGCATCAGCT   | 436 | 421  | 10 | -8.48  | -71.5 | -203.2  |
| sra43 | GGGGCTTCGC   | 738 | 115  | 10 | -11.38 | -77.9 | -214.48 |
| sra44 | GCAGCTTGTC   | 33  | 1025 | 10 | -8.82  | -76.5 | -218.21 |
| sra47 | AAAGTCGCCG   | 41  | 30   | 10 | -9.48  | -76.8 | -217.04 |
| sra57 | ACTTCCACTG   | 54  | 1229 | 10 | -7.51  | -71.1 | -205.04 |
| sra61 | CGAGGATGAC   | 201 | 314  | 10 | -8.15  | -74.9 | -215.21 |
| sra62 | TGTTGATCGC   | 370 | 653  | 10 | -8.07  | -74.9 | -215.47 |
| sra64 | CGCTTCAGCT   | 523 | 1102 | 10 | -9.33  | -75.8 | -214.32 |

|                                 |             |               |      |      |        |        |         |         |
|---------------------------------|-------------|---------------|------|------|--------|--------|---------|---------|
| <b>SMc01525</b><br><b>dppA2</b> | sra39       | GCCGCCGAGGCCG | 713  | 1591 | 13     | -18.32 | -109    | -292.36 |
|                                 | sra47       | GCCGGCCTTCGCC | 125  | 513  | 13     | -16.92 | -106.3  | -288.19 |
|                                 | sra51       | GCGCGCTTGCGC  | 37   | 160  | 13     | -18.02 | -112.8  | -305.6  |
|                                 | sra40       | GGTGATCGGATT  | 66   | 1296 | 12     | -9.66  | -88     | -252.58 |
|                                 | sra55       | GCGCGAGCCGCT  | 329  | 842  | 12     | -16.16 | -100.4  | -271.6  |
|                                 | sra11       | GGCGACCTCCG   | 896  | 81   | 11     | -12.83 | -87.4   | -240.43 |
|                                 | sra14       | GAACGGGCCAG   | 812  | 972  | 11     | -11.59 | -85     | -236.68 |
|                                 | sra17       | GTCACGGATTT   | 503  | 1051 | 11     | -8.27  | -80.9   | -234.17 |
|                                 | sra26       | CGGATTGCCGG   | 239  | 1302 | 11     | -11.84 | -86.6   | -241.06 |
|                                 | sra29       | CGGTCGAGAGC   | 104  | 1463 | 11     | -11.46 | -87.4   | -244.85 |
|                                 | sra50       | CGCCGGTGAGG   | 321  | 1208 | 11     | -12.97 | -87.7   | -240.95 |
|                                 | sra54       | GCCGGTTCGCC   | 121  | 901  | 11     | -13.43 | -89.1   | -243.99 |
| sra58                           | TCGAGCGCGAG | 115           | 838  | 11   | -12.46 | -89.2  | -247.44 |         |
| sra60                           | TCGGCAACGCC | 315           | 448  | 11   | -12.73 | -87.4  | -240.75 |         |
| sra01                           | TCTTGTCAC   | 339           | 1082 | 10   | -7.52  | -71.5  | -206.3  |         |
| sra02                           | CCGGCGACCT  | 28            | 79   | 10   | -11.72 | -77    | -210.49 |         |
| sra03                           | ATTGCCGGAG  | 80            | 1305 | 10   | -9.14  | -73.6  | -207.84 |         |
| sra06                           | ACCGTCCAGC  | 123           | 1369 | 10   | -10.39 | -75.3  | -209.29 |         |
| sra08                           | GTGCCGCCGA  | 201           | 1589 | 10   | -12.22 | -79.5  | -216.94 |         |
| sra09                           | GCCTTTTCCG  | 111           | 1189 | 10   | -8.8   | -75.9  | -216.33 |         |
| sra10                           | AGGCGGCAAG  | 915           | 1598 | 10   | -10.69 | -75.8  | -209.94 |         |
| sra12                           | TCGTGGTTGC  | 18            | 349  | 10   | -9.43  | -75.9  | -214.33 |         |

|       |            |      |      |    |        |       |         |
|-------|------------|------|------|----|--------|-------|---------|
| sra16 | GGTGATGATG | 88   | 1497 | 10 | -6.99  | -72.5 | -211.24 |
| sra18 | CTTCTGCAGC | 71   | 135  | 10 | -8.68  | -75.9 | -216.73 |
| sra21 | CGCGCGCGGT | 137  | 358  | 10 | -14.32 | -85.8 | -230.47 |
| sra23 | GAGGTTTCGC | 69   | 807  | 10 | -8.7   | -76.6 | -218.92 |
| sra25 | CGTTGAGATC | 51   | 1412 | 10 | -7.05  | -74.8 | -218.45 |
| sra27 | GTTGCGCGCG | 173  | 354  | 10 | -12.52 | -85.8 | -236.27 |
| sra31 | CGGCGCGCTT | 65   | 158  | 10 | -12.77 | -82.5 | -224.84 |
| sra32 | GAACTCGAAA | 548  | 1607 | 10 | -6.48  | -72.7 | -213.5  |
| sra36 | GCCGGACGAG | 168  | 1424 | 10 | -11.19 | -79.4 | -219.93 |
| sra38 | TGTCGAGCTT | 1012 | 1250 | 10 | -8.35  | -72.6 | -207.15 |
| sra41 | AAGGATTCGG | 541  | 442  | 10 | -7.58  | -71.4 | -205.78 |
| sra43 | CGCATAGGGC | 32   | 1137 | 10 | -9.88  | -76.7 | -215.45 |
| sra45 | GGCGGCCTTC | 162  | 1179 | 10 | -11.38 | -77.9 | -214.48 |
| sra46 | CGTCCCCTTC | 167  | 738  | 10 | -9.48  | -74.9 | -210.94 |
| sra53 | AGTTCCGGAA | 175  | 211  | 10 | -8.14  | -70.4 | -200.75 |
| sra57 | CTCGGGTTTT | 143  | 687  | 10 | -7.82  | -72.3 | -207.91 |
| sra59 | AGGATTCGGC | 135  | 443  | 10 | -9     | -73.3 | -207.31 |
| sra63 | GCCGAAATCG | 159  | 1014 | 10 | -8.94  | -78.2 | -223.32 |
| sra65 | TTGTCGTATT | 335  | 1024 | 10 | -5.73  | -69.7 | -206.24 |
| sra66 | ATTCGGCAAC | 211  | 446  | 10 | -8.18  | -74.1 | -212.56 |

|                 |       |              |              |     |    |        |        |         |
|-----------------|-------|--------------|--------------|-----|----|--------|--------|---------|
| <b>SMc02118</b> | sra02 | AAGATCGCGGCC | 259          | 811 | 12 | -12.86 | -93.7  | -260.66 |
|                 | aapJ  | sra21        | CGCGCTCGATCT | 19  | 56 | 12     | -12.85 | -96.4   |
|                 | sra06 | CAGCGGACCGG  | 129          | 1   | 11 | -12.97 | -87.7  | -240.95 |
|                 | sra12 | CGTCAAGCGTC  | 78           | 941 | 11 | -10.61 | -88.2  | -250.16 |
|                 | sra14 | CGCCAACGAGA  | 683          | 992 | 11 | -11.02 | -85.6  | -240.45 |
|                 | sra17 | CGTCGAATCCG  | 797          | 845 | 11 | -10.38 | -87.7  | -249.3  |
|                 | sra22 | GGCCGGCGTCG  | 89           | 458 | 11 | -14.83 | -91.8  | -248.18 |
|                 | sra23 | TTCCGACTGCC  | 216          | 116 | 11 | -10.79 | -83    | -232.84 |
|                 | sra26 | ATCTTCAGCGG  | 90           | 64  | 11 | -9.42  | -81.6  | -232.72 |
|                 | sra27 | CTGCAGCGCCG  | 69           | 747 | 11 | -13.66 | -91    | -249.38 |
|                 | sra33 | AGCGCCGAAA   | 397          | 751 | 11 | -11.87 | -84    | -232.56 |
|                 | sra43 | GCGGCGGATGC  | 479          | 952 | 11 | -13.66 | -90.3  | -247.11 |
|                 | sra63 | GGCGAGGCCGG  | 1018         | 891 | 11 | -14.41 | -88.6  | -239.21 |
|                 | sra65 | TGGAGATGATC  | 280          | 359 | 11 | -7.57  | -77.6  | -225.8  |
|                 | sra01 | ATCTCCGGCA   | 181          | 367 | 10 | -9.45  | -71.7  | -200.7  |
|                 | sra03 | GATTGGCCTG   | 227          | 245 | 10 | -8.49  | -73.7  | -210.26 |
|                 | sra07 | GGAAAGCGCT   | 122          | 757 | 10 | -9.44  | -75.4  | -212.67 |
|                 | sra10 | TTGACCTTGC   | 86           | 790 | 10 | -7.95  | -72.6  | -208.45 |
|                 | sra24 | CGTCACCCTG   | 511          | 323 | 10 | -9.64  | -76.2  | -214.59 |
|                 | sra28 | TTGGCGGAGA   | 644          | 769 | 10 | -9.57  | -72.4  | -202.59 |
|                 | sra32 | GCGCCCGGAA   | 43           | 588 | 10 | -12.18 | -78.5  | -213.84 |
|                 | sra37 | GTCGAGTTCC   | 192          | 618 | 10 | -8.27  | -75.5  | -216.78 |
|                 | sra38 | GCGTTGAGGC   | 286          | 46  | 10 | -10.29 | -78.8  | -220.88 |
|                 | sra39 | CGGCGGCGCC   | 648          | 584 | 10 | -14.78 | -85    | -226.4  |
|                 | sra40 | GCGCCGAAA    | 193          | 589 | 10 | -11.05 | -78.4  | -217.14 |
|                 | sra45 | GCCGTCGCCG   | 197          | 801 | 10 | -13.18 | -83.8  | -227.69 |
|                 | sra48 | GAAACCGGCG   | 244          | 885 | 10 | -10.31 | -79.2  | -222.13 |
|                 | sra49 | CGGCGGTGCG   | 235          | 9   | 10 | -13.32 | -84.1  | -228.22 |
|                 | sra50 | GGCGCAGCGA   | 832          | 410 | 10 | -12.42 | -80.7  | -220.16 |
|                 | sra53 | TTCACGTCGA   | 314          | 613 | 10 | -8.4   | -74.4  | -212.8  |
|                 | sra55 | GCGGCGCCGG   | 37           | 586 | 10 | -14.78 | -85    | -226.4  |
|                 | sra57 | GAAAGCGCTC   | 136          | 758 | 10 | -8.89  | -77.8  | -222.17 |
|                 | sra61 | GGTTGTACTG   | 170          | 509 | 10 | -6.93  | -72.9  | -212.69 |
|                 | sra66 | GTCGTCGTGC   | 369          | 559 | 10 | -10.24 | -80.9  | -227.82 |



| <b>SMc00948</b> |            |                |      |      |        |        |         |         |
|-----------------|------------|----------------|------|------|--------|--------|---------|---------|
| <b>glnA</b>     | sra35      | CAGCCGCCGATCGA | 120  | 1234 | 14     | -16.29 | -113.1  | -312.14 |
|                 | sra01      | AGGAGTCGATCTG  | 301  | 83   | 13     | -10.9  | -96.5   | -275.98 |
|                 | sra10      | GGCTTTCGAGCG   | 837  | 146  | 12     | -12.42 | -96.4   | -270.78 |
|                 | sra14      | CGTCGGCGAACA   | 270  | 1268 | 12     | -13.05 | -96.8   | -270.03 |
|                 | sra25      | TGAAGGAGTCGA   | 135  | 80   | 12     | -9.95  | -87.2   | -249.07 |
|                 | sra47      | GTTTCCGGATCG   | 72   | 1186 | 12     | -10.66 | -93     | -265.48 |
|                 | sra61      | ACCCGGGACGAG   | 253  | 432  | 12     | -13.44 | -91.8   | -252.66 |
|                 | sra65      | CAAAGGTCGGCT   | 46   | 560  | 12     | -11.3  | -90.5   | -255.36 |
|                 | sra16      | CGCAGACGACA    | 217  | 1292 | 11     | -11.06 | -86.6   | -243.57 |
|                 | sra19      | CCGCAGACGGT    | 4    | 172  | 11     | -12.28 | -85.9   | -237.38 |
|                 | sra27      | CGGAAAGCCCG    | 469  | 533  | 11     | -11.8  | -86.6   | -241.16 |
|                 | sra38      | CTGTCGAGCTT    | 1011 | 946  | 11     | -9.42  | -82.6   | -235.95 |
|                 | sra45      | CTTGAAACCGG    | 385  | 954  | 11     | -9.03  | -83     | -238.51 |
|                 | sra53      | CGAGCGCTTCG    | 128  | 152  | 11     | -12.15 | -91.1   | -254.55 |
|                 | sra60      | CGAGCGCTTCG    | 701  | 152  | 11     | -12.15 | -91.1   | -254.55 |
|                 | sra63      | CGTGCTGCAGC    | 482  | 1313 | 11     | -12.3  | -89.3   | -248.25 |
|                 | sra64      | CGCTGCCACTT    | 68   | 759  | 11     | -11.24 | -84.7   | -236.84 |
|                 | sra66      | CTTGCCCGTGC    | 662  | 1077 | 11     | -12.07 | -87.1   | -241.91 |
|                 | sra08      | GCCGCCGATC     | 203  | 1236 | 10     | -11.53 | -80.2   | -221.41 |
|                 | sra09      | AGGAGTTCGT     | 47   | 452  | 10     | -8.02  | -70.7   | -202.09 |
|                 | sra11      | GGCATCGAAC     | 1192 | 726  | 10     | -8.73  | -76.6   | -218.82 |
|                 | sra21      | GCCGCCCTTG     | 160  | 870  | 10     | -11.51 | -78.2   | -215.01 |
|                 | sra22      | TGTCGCAGAA     | 125  | 1133 | 10     | -8.5   | -73.3   | -208.95 |
|                 | sra32      | GCCCTTGACA     | 106  | 873  | 10     | -9.05  | -72.7   | -205.23 |
|                 | sra33      | TGGGGTCGGT     | 272  | 1331 | 10     | -10.6  | -71.5   | -196.36 |
|                 | sra34      | CGGACTTCGA     | 13   | 331  | 10     | -8.92  | -75.5   | -214.68 |
|                 | sra36      | GTCGAAAACG     | 79   | 102  | 10     | -7.63  | -77.9   | -226.58 |
|                 | sra39      | ACCGGATCGA     | 196  | 1120 | 10     | -9.36  | -72.8   | -204.54 |
|                 | sra40      | GACGCCAGC      | 858  | 738  | 10     | -11.42 | -78.9   | -217.58 |
|                 | sra43      | CATCTTGTCG     | 170  | 702  | 10     | -7.18  | -75.1   | -219    |
|                 | sra48      | GCATTCAGCG     | 458  | 478  | 10     | -9.06  | -78.1   | -222.61 |
|                 | sra49      | CGGGGGCGGT     | 55   | 883  | 10     | -13.08 | -77     | -206.1  |
|                 | sra50      | CCGTGTCGTC     | 564  | 917  | 10     | -9.9   | -79.1   | -223.12 |
|                 | sra51      | GGCATGAAGG     | 147  | 637  | 10     | -8.49  | -73.7   | -210.26 |
| sra55           | AAACCGGATC | 17             | 1118 | 10   | -7.72  | -72    | -207.27 |         |
| sra58           | GGATGCGGCA | 60             | 371  | 10   | -10.73 | -76.2  | -211.09 |         |
| sra62           | TTGTCCATGG | 445            | 226  | 10   | -7.65  | -70.8  | -203.6  |         |

| <b>SMb21549</b> |       |              |      |     |    |        |        |         |
|-----------------|-------|--------------|------|-----|----|--------|--------|---------|
| <b>thtR</b>     | sra16 | CCGCCGGCGGCG | 641  | 463 | 12 | -18.34 | -103.6 | -274.88 |
|                 | sra61 | TCGAGGATGACG | 200  | 781 | 12 | -10.87 | -91.5  | -259.99 |
|                 | sra63 | CCGCCGTGAGG  | 828  | 490 | 12 | -14.73 | -98    | -268.47 |
|                 | sra02 | CGGCGACCTTG  | 29   | 761 | 11 | -11.84 | -87.6  | -244.27 |
|                 | sra10 | CGGGGCGGGCG  | 177  | 206 | 11 | -16.06 | -91.2  | -242.26 |
|                 | sra24 | GCGACCTTGTC  | 117  | 763 | 11 | -10.37 | -85.6  | -242.55 |
|                 | sra38 | TCCCGCCGGCG  | 1063 | 461 | 11 | -15.21 | -89.2  | -238.56 |
|                 | sra39 | TGACGCCGGCC  | 571  | 350 | 11 | -13.86 | -87.5  | -237.43 |
|                 | sra40 | GCGGCGTCGTA  | 366  | 469 | 11 | -12.58 | -89.2  | -247.04 |
|                 | sra47 | CGCCGGCCTTG  | 744  | 353 | 11 | -13.41 | -88.8  | -243.06 |
|                 | sra50 | GCAGCGAGCGC  | 835  | 853 | 11 | -13.87 | -92.5  | -253.52 |
|                 | sra51 | TTCTGCGGCT   | 546  | 402 | 11 | -11.52 | -81.8  | -226.59 |
|                 | sra60 | AGCGCAGCGGC  | 636  | 364 | 11 | -14.4  | -90.1  | -244.09 |
|                 | sra65 | GAGCGCAGCGG  | 954  | 363 | 11 | -13.52 | -90.7  | -248.85 |
|                 | sra11 | GTTTGTCGCC   | 793  | 740 | 10 | -8.98  | -77.5  | -220.93 |

|       |            |     |     |    |        |       |         |
|-------|------------|-----|-----|----|--------|-------|---------|
| sra17 | CGGGCGCGCC | 63  | 24  | 10 | -14.78 | -85   | -226.4  |
| sra19 | GCGGGCTTAT | 34  | 839 | 10 | -9.18  | -73.9 | -208.68 |
| sra22 | GCCGGATCGG | 544 | 31  | 10 | -11.18 | -78.4 | -216.73 |
| sra26 | ATTCGCCTTG | 173 | 810 | 10 | -8.04  | -73.5 | -211.07 |
| sra28 | ATTGCCGCCA | 163 | 479 | 10 | -10.16 | -73.7 | -204.86 |
| sra32 | CGGCGGCAGC | 230 | 654 | 10 | -13.26 | -82.7 | -223.9  |
| sra41 | CGTGAATGCT | 68  | 885 | 10 | -8.06  | -74.5 | -214.21 |
| sra43 | TCGCATAGGG | 31  | 704 | 10 | -8.74  | -72.9 | -206.85 |
| sra48 | CGAGGATGAC | 214 | 782 | 10 | -8.15  | -74.9 | -215.21 |
| sra53 | GCCGTCGAGG | 185 | 492 | 10 | -11.19 | -79.4 | -219.93 |
| sra55 | CCGGGCGCGC | 43  | 23  | 10 | -14.78 | -85   | -226.4  |
| sra58 | GCCGGCCATC | 30  | 332 | 10 | -11.41 | -77.9 | -214.38 |
| sra59 | GACCCCGGAA | 77  | 265 | 10 | -10.03 | -72.9 | -202.72 |
| sra64 | CATGGTGGTG | 475 | 69  | 10 | -8.46  | -73.8 | -210.67 |

---
